# Supplementary material for: Serum Peptidome Patterns of Colorectal Cancer Based on Magnetic Bead Separation and MALDI-TOF Mass Spectrometry Analysis
Source: Hindawi journal article supplement (doi:10.1155/2012/985020), 2012-01-01
Supplement: f1 [file 985020.f1.doc]

| Supplemental data  Table 1 Statistic of the 61 candidate biomarkers for identifying CRC from health individuals. | | | | | | | | |
| --- | --- | --- | --- | --- | --- | --- | --- | --- |
| Mass | PW1 | PAD2 | Ave(C)3 | Ave(N)4 | SD(C)5 | SD(N)6 | CV(C)7 | CV(N)8 |
| 5907.39 | < 0.000001 | 0.00111 | 763.44 | 241.89 | 390.27 | 216.83 | 51.12 | 89.64 |
| 797.46 | < 0.000001 | < 0.000001 | 130.06 | 604.18 | 107.36 | 156.07 | 82.54 | 25.83 |
| 824.78 | < 0.000001 | < 0.000001 | 85.23 | 524.59 | 96.82 | 129.19 | 113.6 | 24.63 |
| 4210.93 | < 0.000001 | 0.0254 | 910.27 | 490.27 | 286.26 | 181.16 | 31.45 | 36.95 |
| 9300.76 | < 0.000001 | 0.00000113 | 462.69 | 59.48 | 238.38 | 100.14 | 51.52 | 168.35 |
| 2660.82 | < 0.000001 | 0.0137 | 383.09 | 155.8 | 139.81 | 136.32 | 36.5 | 87.5 |
| 7772.38 | < 0.000001 | < 0.000001 | 232.5 | 6.75 | 111.94 | 10.39 | 48.15 | 154.08 |
| 849.66 | < 0.000001 | < 0.000001 | 52.01 | 266.46 | 47.69 | 79.19 | 91.69 | 29.72 |
| 1617.78 | < 0.000001 | < 0.000001 | 237.55 | 51.01 | 169.94 | 36.35 | 71.54 | 71.26 |
| 741.43 | < 0.000001 | < 0.000001 | 43.32 | 214.97 | 32.09 | 57.61 | 74.07 | 26.8 |
| 4645.43 | < 0.000001 | 0.00000815 | 178.91 | 37.55 | 72.4 | 35.8 | 40.47 | 95.33 |
| 4091.82 | 0.0000017 | 0.00000163 | 290.65 | 149.57 | 145.18 | 59.68 | 49.95 | 39.9 |
| 682.37 | < 0.000001 | < 0.000001 | 24.11 | 164.03 | 30.44 | 95.25 | 126.26 | 58.07 |
| 909.82 | < 0.000001 | < 0.000001 | 19.78 | 152.74 | 31.36 | 108.63 | 158.57 | 71.12 |
| 1466.77 | < 0.000001 | < 0.000001 | 165.12 | 37.74 | 127.85 | 20.42 | 77.43 | 54.1 |
| 720.62 | < 0.000001 | < 0.000001 | 18.65 | 132.55 | 17.31 | 70.4 | 92.85 | 53.11 |
| 1546.58 | < 0.000001 | 0.000331 | 167.66 | 59.33 | 75.82 | 30.08 | 45.22 | 50.7 |
| 3241.4 | < 0.000001 | 0.0000284 | 144.62 | 42.44 | 66.11 | 33.87 | 45.71 | 79.8 |
| 5338.71 | < 0.000001 | 0.00000528 | 128.68 | 30.24 | 69.49 | 25.62 | 54 | 84.71 |
| 895.59 | < 0.000001 | < 0.000001 | 29.69 | 126.33 | 27.01 | 63.65 | 90.99 | 50.38 |
| 2952.94 | < 0.000001 | 0.000806 | 131.56 | 46.55 | 56.33 | 29.26 | 42.82 | 62.86 |
| 3952.53 | < 0.000001 | < 0.000001 | 88.31 | 21.27 | 45.87 | 11.69 | 51.94 | 54.95 |
| 4965.34 | < 0.000001 | < 0.000001 | 82.86 | 16.17 | 68.66 | 35.98 | 82.86 | 222.45 |
| 4054.81 | < 0.000001 | 0.0000367 | 110.48 | 47.82 | 54.27 | 28.26 | 49.12 | 59.1 |
| 2863.08 | < 0.000001 | < 0.000001 | 81.96 | 20.04 | 79.57 | 16.27 | 97.08 | 81.21 |
| 3263.36 | < 0.000001 | 0.000398 | 102.68 | 42.15 | 43.8 | 37.5 | 42.65 | 88.95 |
| 3883.56 | < 0.000001 | < 0.000001 | 64.29 | 12.07 | 22.65 | 5.82 | 35.24 | 48.24 |
| 1866.35 | < 0.000001 | < 0.000001 | 83.37 | 31.27 | 41.01 | 19.06 | 49.19 | 60.96 |
| 1520.21 | < 0.000001 | 0.0000914 | 77.93 | 33.23 | 32.06 | 11.86 | 41.14 | 35.69 |
| 1450.62 | < 0.000001 | < 0.000001 | 67.76 | 29.1 | 33.12 | 10.63 | 48.89 | 36.52 |
| 4268.26 | < 0.000001 | < 0.000001 | 58.9 | 22 | 36.8 | 11.61 | 62.47 | 52.76 |
| 4123.72 | 0.00000159 | 0.00000134 | 73.63 | 36.73 | 36.98 | 18.66 | 50.22 | 50.81 |
| 5868.38 | < 0.000001 | < 0.000001 | 47.3 | 13.1 | 37.28 | 11.98 | 78.82 | 91.46 |
| 3192.38 | < 0.000001 | 0.000331 | 49.43 | 18.22 | 19.72 | 12.27 | 39.89 | 67.38 |
| 2884.13 | < 0.000001 | < 0.000001 | 41.48 | 10.74 | 47.28 | 7.19 | 113.99 | 66.91 |
| 4073.6 | < 0.000001 | 0.00288 | 49.2 | 19.13 | 17.36 | 8.27 | 35.28 | 43.24 |
| 2932.84 | < 0.000001 | 0.000292 | 42.68 | 13.75 | 17.15 | 6.21 | 40.17 | 45.15 |
| 2105.88 | < 0.000001 | 0.00242 | 62.12 | 35.78 | 21.79 | 11.38 | 35.07 | 31.8 |
| 4169.7 | 0.00000181 | 0.0000543 | 44.14 | 22.15 | 20.04 | 9.83 | 45.4 | 44.35 |
| Table 1 Continued | | | | | | | | |
| Mass | PW1 | PAD2 | Ave(C)3 | Ave(N)4 | SD(C)5 | SD(N)6 | CV(C)7 | CV(N)8 |
| 2900.31 | < 0.000001 | < 0.000001 | 31.25 | 9.56 | 34.5 | 4.59 | 110.4 | 48.01 |
| 6635.24 | < 0.000001 | < 0.000001 | 3.68 | 25.22 | 6.29 | 17.33 | 170.89 | 68.74 |
| 2769.91 | < 0.000001 | < 0.000001 | 31.12 | 11.47 | 18.71 | 4.12 | 60.12 | 35.89 |
| 1540.23 | < 0.000001 | 0.00000321 | 29.28 | 10.59 | 13.93 | 4.4 | 47.59 | 41.56 |
| 3935.5 | < 0.000001 | 0.0000181 | 27.83 | 10.65 | 12.77 | 4.74 | 45.89 | 44.53 |
| 1779.25 | 0.00000492 | 0.0000967 | 43.85 | 26.77 | 16.99 | 9.04 | 38.76 | 33.79 |
| 2644.78 | < 0.000001 | 0.0123 | 29.16 | 12.3 | 11.33 | 8.45 | 38.85 | 68.68 |
| 1213.46 | < 0.000001 | 0.00124 | 14.44 | 28.96 | 6.76 | 9.73 | 46.81 | 33.61 |
| 5755.96 | 0.0000572 | < 0.000001 | 17.52 | 3.8 | 22.05 | 7.32 | 125.82 | 192.5 |
| 4155.14 | < 0.000001 | 0.00000733 | 22.47 | 9.58 | 9.45 | 3.72 | 42.05 | 38.86 |
| 5636.48 | 0.00116 | < 0.000001 | 15.24 | 3.61 | 20.21 | 2.54 | 132.61 | 70.45 |
| 2723.35 | < 0.000001 | 0.0000753 | 14.98 | 4.15 | 5.5 | 1.98 | 36.68 | 47.55 |
| 1207.42 | < 0.000001 | 0.000434 | 18.67 | 8.05 | 8.08 | 2.89 | 43.29 | 35.94 |
| 4248.84 | 0.00133 | 0.0324 | 17.16 | 26.93 | 9.87 | 12.38 | 57.54 | 45.97 |
| 1351 | 0.00000152 | < 0.000001 | 20.35 | 11.31 | 11.29 | 4.2 | 55.51 | 37.16 |
| 3316.26 | < 0.000001 | 0.0000438 | 5.57 | 14.35 | 3.09 | 4.86 | 55.53 | 33.88 |
| 2545.55 | < 0.000001 | 0.0147 | 17.78 | 9.29 | 4.84 | 3 | 27.25 | 32.3 |
| 2877.97 | < 0.000001 | < 0.000001 | 10.91 | 3.59 | 6.39 | 2.43 | 58.6 | 67.65 |
| 4110.58 | < 0.000001 | 0.0000155 | 13.28 | 6.27 | 6.01 | 2.62 | 45.27 | 41.71 |
| 5066.24 | 0.000319 | 0.00017 | 13.42 | 6.43 | 8.33 | 4.51 | 62.06 | 70.1 |
| 4676.49 | < 0.000001 | 0.0000254 | 10.04 | 3.44 | 4.01 | 1.58 | 39.99 | 45.92 |
| 2046.31 | 0.00906 | 0.000378 | 23.27 | 17.64 | 8.72 | 5.7 | 37.5 | 32.28 |

1P value calculated with the Wilcoxon test; values lower than 0.05 suggest statistical relevance.

2P value calculated with the Anderson-Darling test, values lower than 0.05 suggest statistical relevance.

3Average area of peaks for colorectal cancer subjects.

4Average area of peaks for health subjects.

5Standard deviation of peaks for colorectal cancer subjects.

6Standard deviation of peaks for health subjects.

7Coefficient of variability of peaks for colorectal cancer subjects.

8Coefficient of variability of peaks for health subjects.
